# Supplementary material
Source: ML conference proceedings conference paper supplement (https://openreview.net/forum?id=CFAsKosKwwk)

Student-t (unbounded 4-th moment)

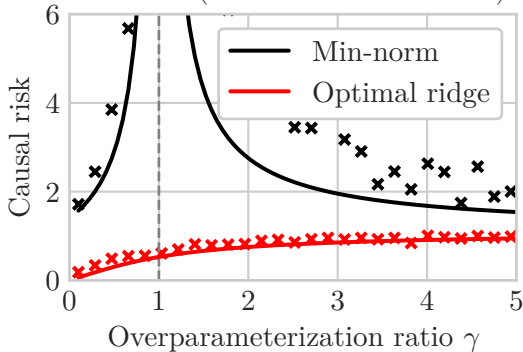

Supplement: supplementary_material [file attachment]

Student-t (finite 4-th moment)

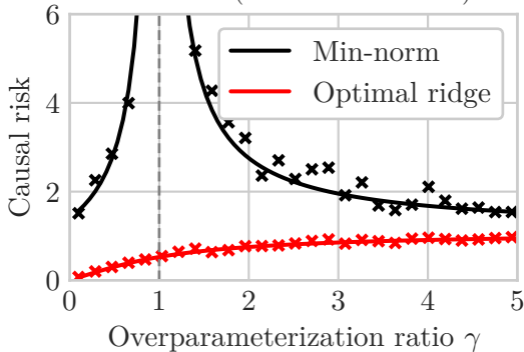

Supplement: supplementary_material [file attachment]

## GMM

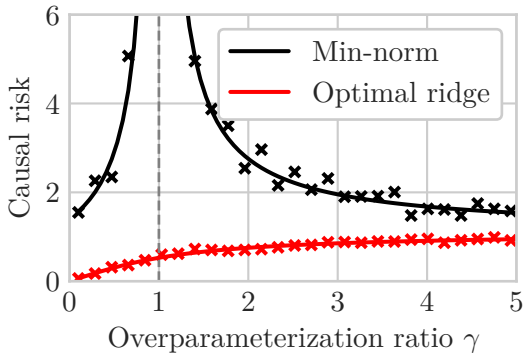

Supplement: supplementary_material [file attachment]

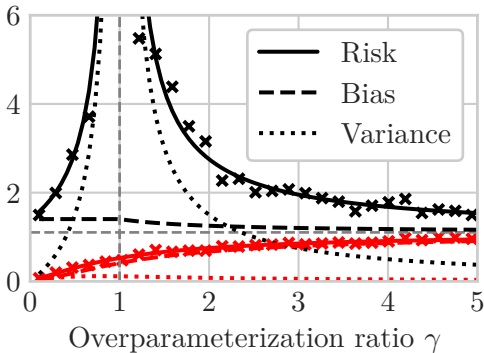

Supplement: supplementary_material [file attachment]

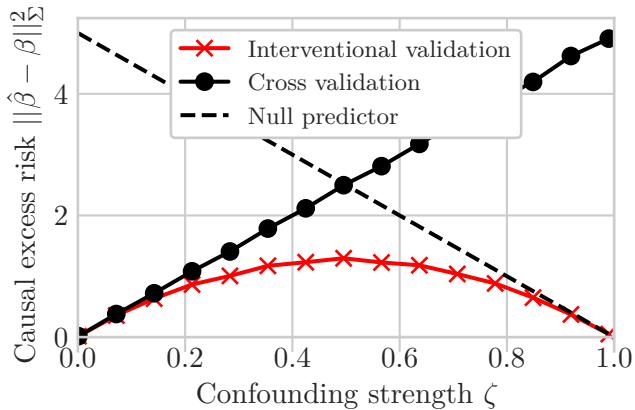

Supplement: supplementary_material [file attachment]

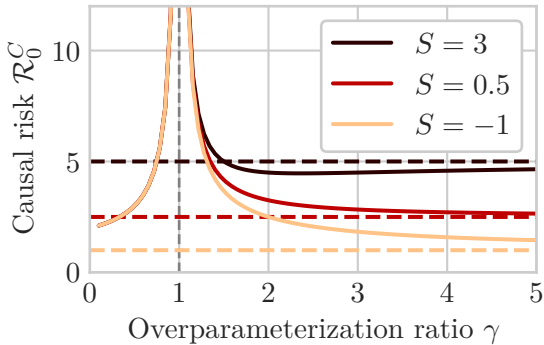

Supplement: supplementary_material [file attachment]
